# Supplementary material for: Controlled synthesis and luminescence properties of rhombic NaLn(MoO4)2 submicrocrystals
Source: Royal Society of Chemistry journal article supplement (doi:10.1039/c2ce25414j), 2012-01-01

## Supporting Information

### Controlled Synthesis and Luminescence Properties of Rhombic $\text{NaLn}(\text{MoO}_4)_2$ Submicrocrystals

Ying Li, Guofeng Wang,\* Kai Pan, Wei Zhou, Cheng Wang, Naiying Fan, Yajie Chen, Qingmao Feng and Binbin Zhao

*Key Laboratory of Functional Inorganic Material Chemistry, Ministry of Education, School of Chemistry and Materials Science, Heilongjiang University, Harbin, 150080, P. R. China.*

*E-mail: wanggf75@gmail.com*

**Fig. S1.** The structural refinement pattern of  $\text{NaY}(\text{MoO}_4)_2$  using XRD datum.

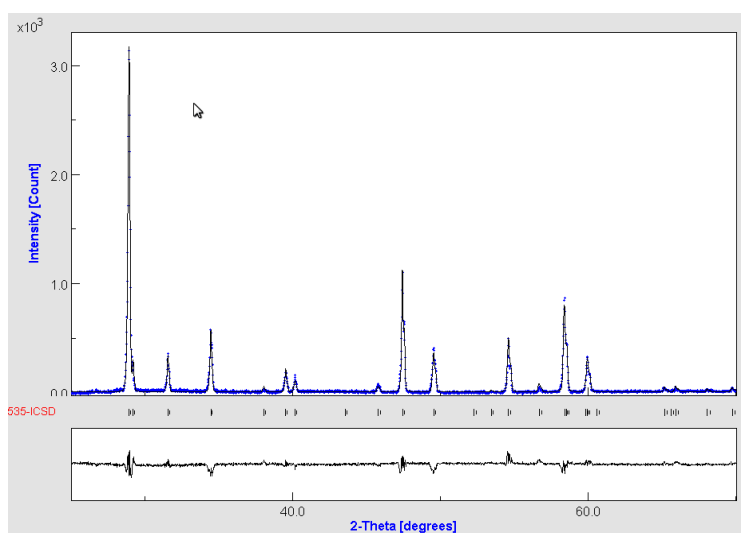

**Fig. S2.** EDXA patterns of NaY(MoO<sub>4</sub>)<sub>2</sub>, NaYb(MoO<sub>4</sub>)<sub>2</sub>, NaEr(MoO<sub>4</sub>)<sub>2</sub>, and NaTm(MoO<sub>4</sub>)<sub>2</sub>.

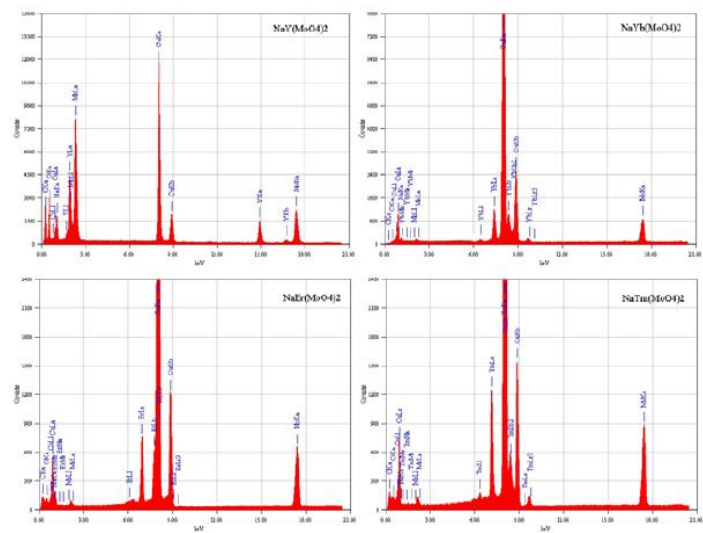

**Fig. S3.** XRD patterns of  $\text{NaLn}(\text{MoO}_4)_2$  prepared at 160 °C for 24 h: (a) Ln = Yb, (b) Ln = Tm, (c) Ln = Er, (d) Ln = Y, (e) Ln = Dy, (f) Ln = Gd, (g) Ln = Eu, (h) Ln = Sm, and (i) Ln = Ce.

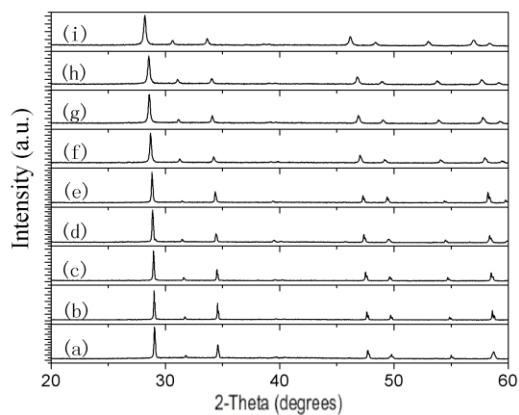

**Fig. S4.** Decay curve of 530 nm emission of  $\text{Er}^{3+}$  in  $\text{NaY}(\text{MoO}_4)_2:\text{Yb}^{3+}/\text{Er}^{3+}$  under 980 nm excitation.

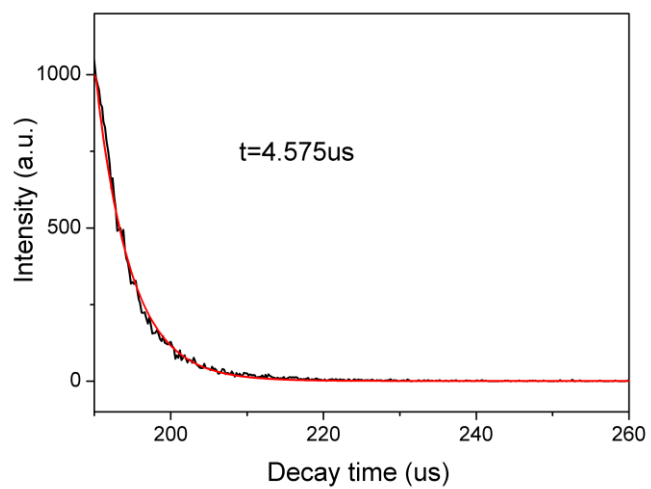

**Fig. S5.** Decay curve of 476 nm emission of  $\text{Tm}^{3+}$  in  $\text{NaY}(\text{MoO}_4)_2:\text{Yb}^{3+}/\text{Tm}^{3+}$  under 980 nm excitation.

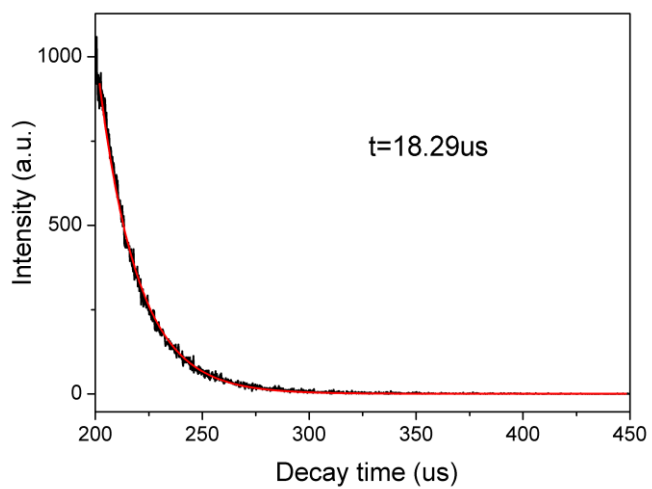

**Fig. S6.** Decay curve of 612 nm emission of  $\text{Eu}^{3+}$  in  $\text{NaY}(\text{MoO}_4)_2:\text{Eu}^{3+}$  under 455 nm excitation.

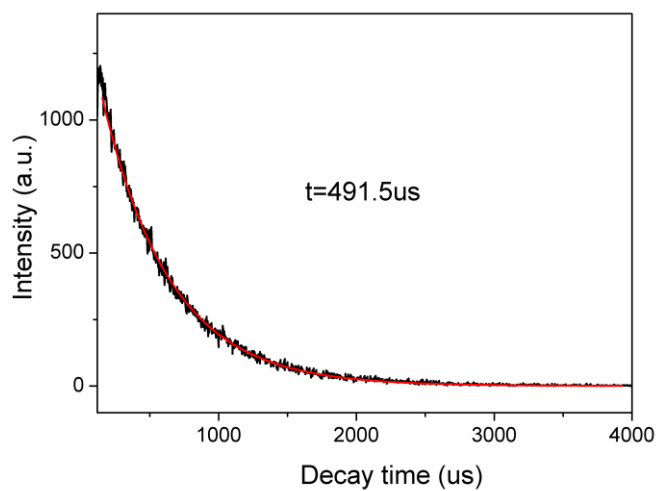

Supplement: c2ce25414j.pdf [file c2ce25414j.pdf]
